# Supplementary material
Source: PubMed Central journal article supplement (PMC6142232)
Supplement: pnas.1803745115.sapp.pdf [file pnas.1803745115.sapp.pdf]

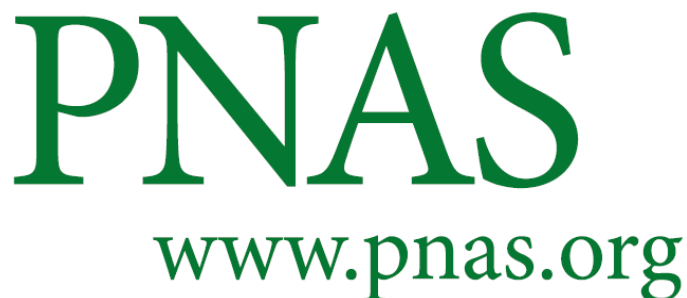

## Supplementary Information for

### Accelerating pathway evolution by increasing the gene dosage of chromosomal segments

Melissa Tumen-Velasquez<sup>a,1</sup>, Christopher W. Johnson<sup>b,1</sup>, Alaa Ahmed<sup>a</sup>, Graham Dominick<sup>b</sup>, Emily M. Fulk<sup>b</sup>, Payal Khanna<sup>b</sup>, Sarah A. Lee<sup>c</sup>, Alicia L. Schmidt<sup>a</sup>, Jeffrey G. Linger<sup>b</sup>, Mark A. Eiteman<sup>a,c</sup>, Gregg T. Beckham<sup>b,2</sup>, Ellen L. Neidle<sup>a,2</sup>

<sup>a</sup>Department of Microbiology, University of Georgia, Athens, GA, 30602

<sup>b</sup>National Bioenergy Center, National Renewable Energy Laboratory, Golden, CO, 80401

<sup>c</sup>School of Chemical, Materials and Biomedical Engineering, University of Georgia, Athens, GA, 30602

<sup>1</sup>These authors contributed equally to this work

<sup>2</sup>Corresponding authors: [neidle@uga.edu](mailto:neidle@uga.edu), [gregg.beckham@nrel.gov](mailto:gregg.beckham@nrel.gov)

#### This PDF file includes:

##### Figures

**Fig. S1.** Alignment of GcoA sequences

**Fig. S2.** Alignment of GcoB, BenC, and AntC reductases

**Fig. S3.** Guaiacol metabolism by *P. putida* KT2440 carrying plasmids with *gcoAB* genes

**Fig. S4.** Introduction of foreign DNA enables growth on guaiacol

**Fig. S5.** *A. baylyi* chromosomal arrangements

**Fig. S6.** Replacement of wild-type genomic DNA with DNA from an evolved Gua<sup>+</sup> strain

**Fig. S7.** Selection of a gene fusion

**Fig. S8.** Growth on guaiacol (6 mM) as the sole carbon source by *P. putida* strains with *catA-gcoA* and *gcoB* genes integrated in the chromosome

##### Tables

**Table S1.** Sequences with homology to N-terminal residues from a guaiacol *O*-demethylating cytochrome P450

**Table S2.** *Acinetobacter baylyi* strains

**Table S3.** Plasmids

**Table S4.** Primers

**Table S5.** Synthesized dsDNA fragments containing genes encoding GcoA and GcoB *Rhodococcus pyridinivorans* AK37, optimized for expression in *P. putida* KT2440

**Table S6.** Mutations in ACN1850 outside the *gcoAB* region

#### References for SI



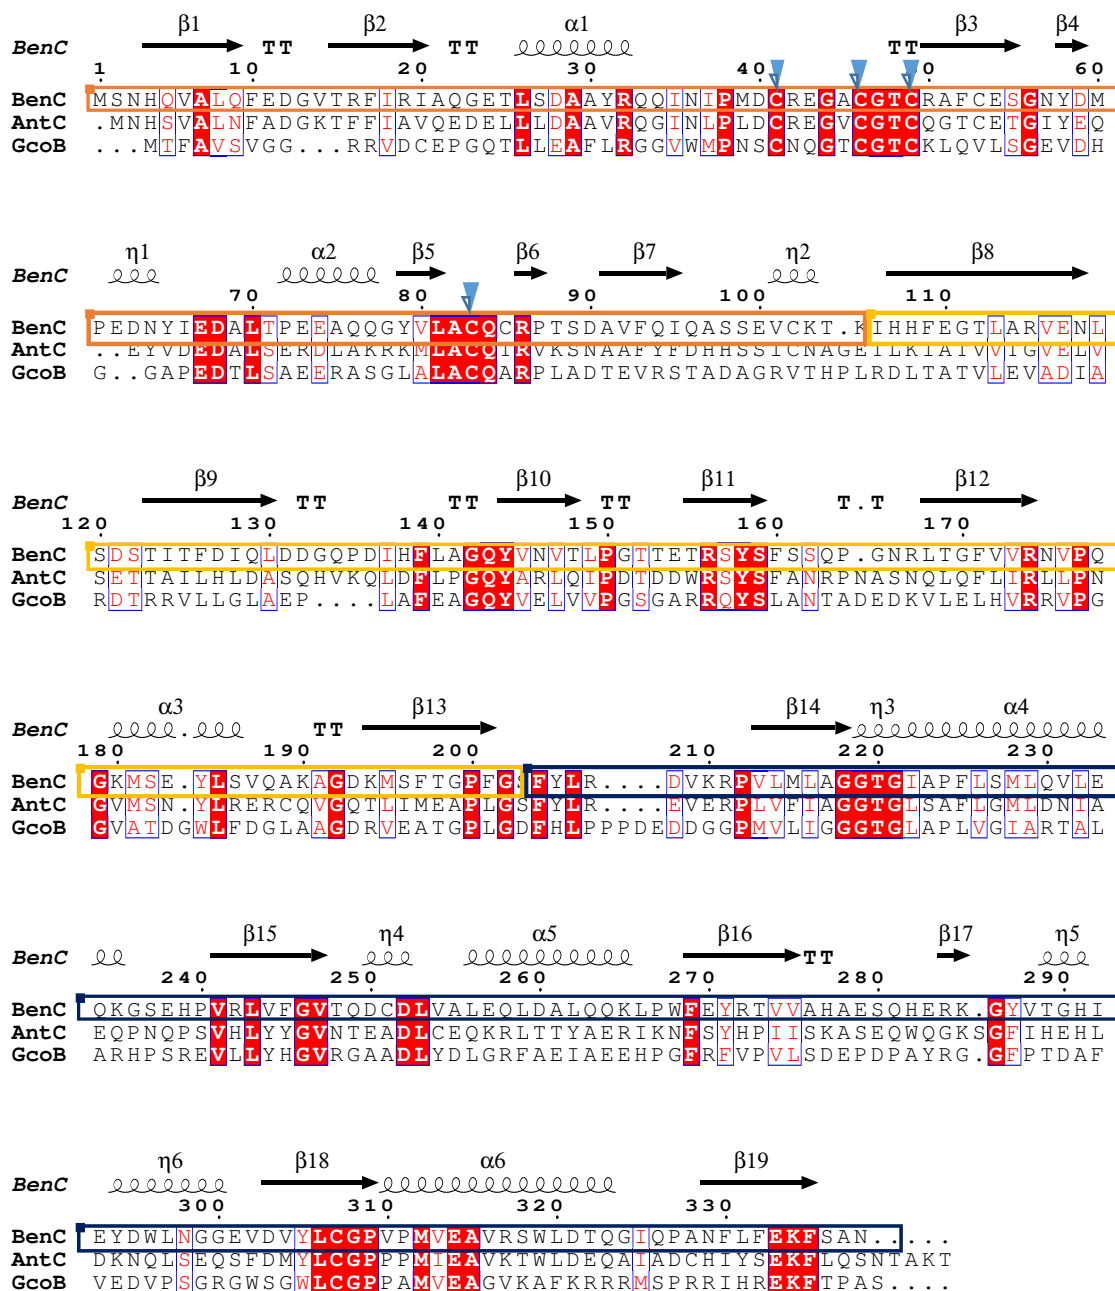

**Fig. S2. Alignment of GcoB, BenC, and AntC reductases.** Homology searches using the deduced amino acid sequence of GcoB from *Amycolatopsis* sp. ATCC 39116 (WP\_020419854) identified significant similarity with BenC and AntC, which are three-domain reductases that partner with dioxygenase components in benzoate 1,2-dioxygenase and anthranilate 1,2-dioxygenase systems, respectively, from *A. baylyi* ADP1.<sup>3-5</sup> Sequences were aligned with Clustal W.<sup>6</sup> Structural elements of BenC<sup>5</sup> are marked by ENDscript/ESPrpt.<sup>7</sup> In BenC, the N-terminal ferredoxin domain is enclosed in an orange box, and blue triangles mark conserved residues involved in iron-sulfur center binding. The other domains of BenC are indicated by a yellow box, to mark the flavin-binding domain, and a dark blue box, to mark the domain that binds NADH.

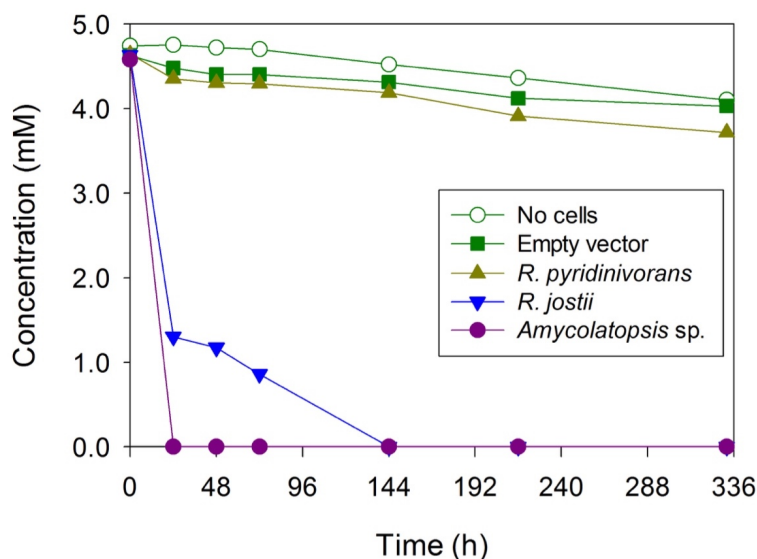

**Fig. S3. Guaiacol metabolism by *P. putida* KT2440 carrying plasmids with *gcoAB* genes.** The guaiacol remaining in culture supernatants (Y axis) is shown for *P. putida* grown in minimal medium with glucose and guaiacol. Cells carried a plasmid vector (pBLT-2) with predicted *gcoAB* genes from *R. pyridinivorans* (pCJ120), *R. jostii* (pCJ114), or *Amycolatopsis* sp. (pCJ021). The concentration of guaiacol in the culture supernatant was analyzed by HPLC. Representative data from two independent experiments is shown. Plasmids are described in Table S3.

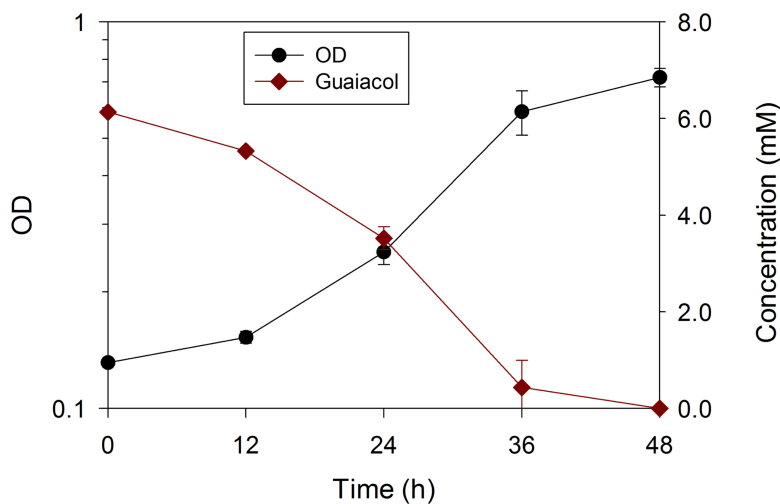

**Fig. S4. Introduction of foreign DNA enables growth on guaiacol.** With plasmid-expressed *Amycolatopsis gcoAB* in *P. putida*, strain KT2440(pCJ021) completely consumed 6 mM guaiacol provided as the sole carbon source in minimal medium. The concentration of guaiacol in the culture supernatant was analyzed using HPLC. Growth was assessed by OD at 600 nm. Data points represent averages of 3 biological replicates, and error bars indicate the standard deviations of the measurements.

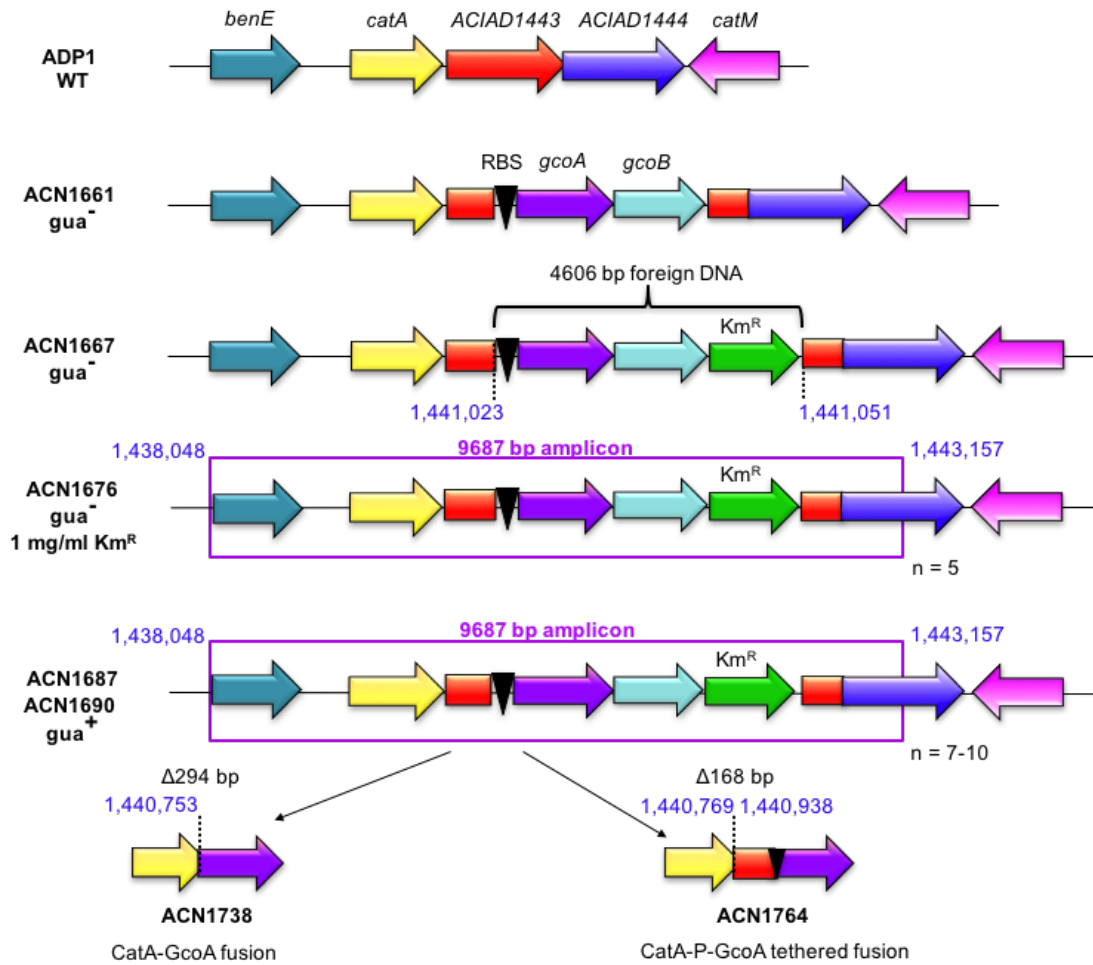

**Fig. S5. *A. baylyi* genetic arrangements.** Foreign DNA was inserted in the ADP1 chromosome (not drawn to scale). Blue numbers mark genomic positions in ADP1 (NCBI reference NC\_005966). The insertion of 15 bp, GAGAGGAGGACAGCT (black triangle), includes a ribosome binding site (RBS). Since this DNA can create an in-frame coding sequence with *gcoA*, the loss of DNA spanning the ends of *catA* and ACIAD1443 can result in gene fusions that encode one protein with a functional portion of CatA connected to GcoA (in its entirety) by a peptide linker (P) consisting of some ACIAD1443 residues and 5 amino acids encoded by the sequence shown in black (ERRTA). In ACN1764, this type of tethered fusion includes a 34-amino acid peptide linker. In ACN1738, regions of CatA and GcoA are directly connected. The purple box indicates the amplified region (amplicon). A copy number of 5 to 10 was detected in different amplification mutants. The 4606 bp region of foreign DNA has a GC content of 63%. ADP1 DNA from *benA* to *catM* has a GC content of 43%.

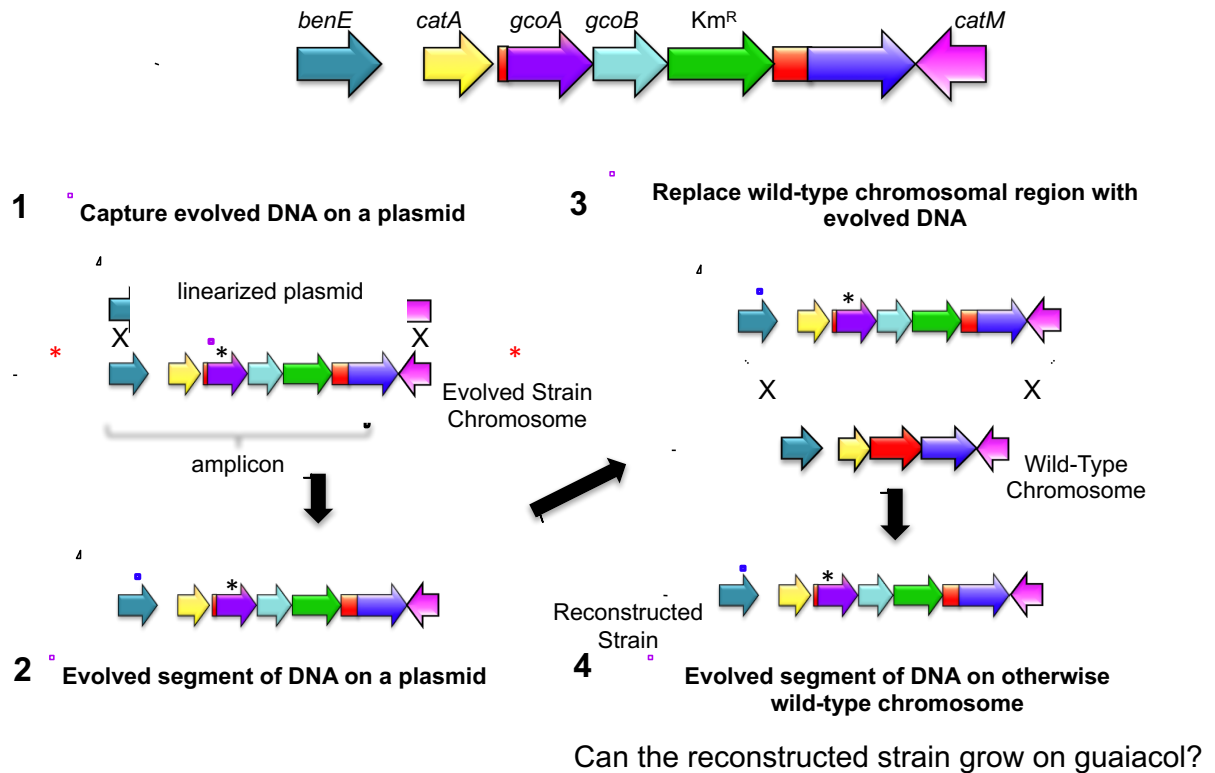

**Fig. S6. Replacement of wild-type genomic DNA with DNA from an evolved  $Gua^+$  strain.** Mutants derived from parent strain ACN1667 (top) may have mutations (\*) in the foreign DNA (purple box), and/or elsewhere in the chromosome (\*). 1) The gap-repair method enables plasmid-based capture of a target region via homologous recombination (X) *in vivo*.<sup>8</sup> 2) Plasmids thus generated carry DNA from the mutant (blue box). 3) This gap-repaired plasmid can then be linearized and used to transform a wild-type recipient to generate reconstructed strains by allelic replacement (selected by  $Km^R$ ). 4) The reconstructed strain can be tested to determine whether a single copy of the evolved DNA is sufficient for  $Gua^+$  growth.

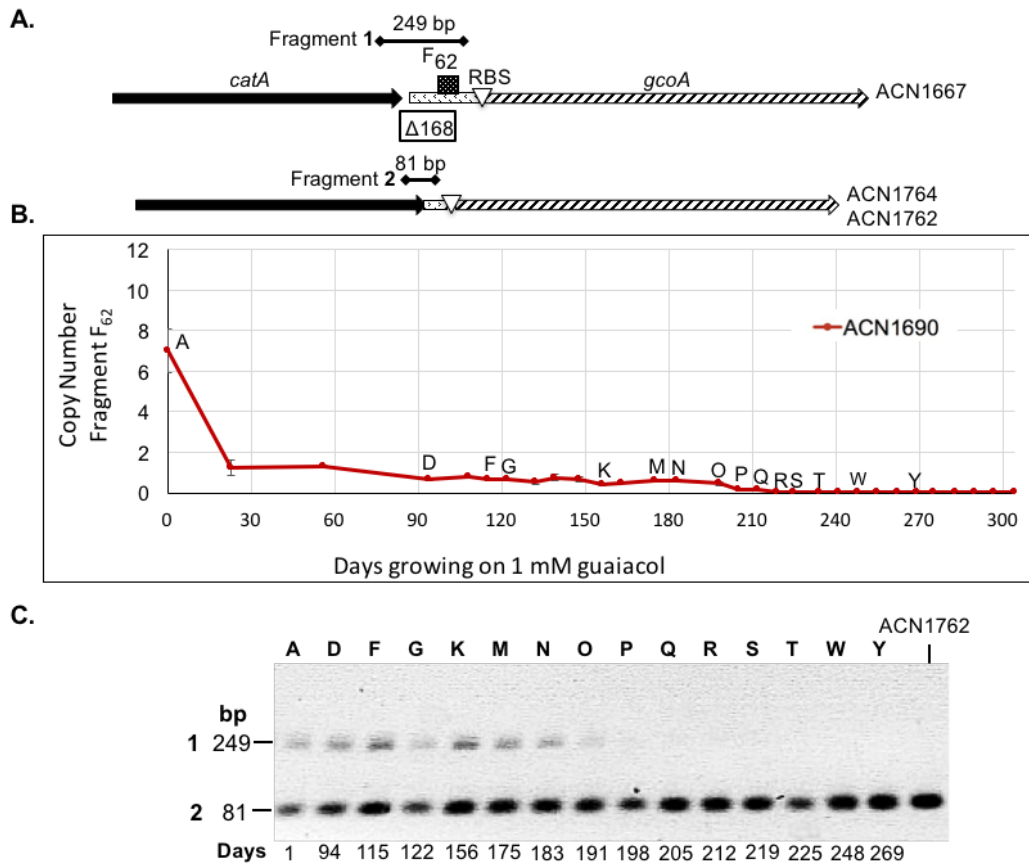

**Fig. S7. Selection of a gene fusion.** **A.** A 249-bp PCR product (Fragment 1) is generated with primers MTV706 and MTV707 using ACN1667 template DNA. With template DNA from ACN1764 or ACN1762, a smaller, 81-bp product forms (Fragment 2), which corresponds to a 168-bp deletion in this region. ACN1764 is a *Gua*<sup>+</sup> derivative of ACN1690 after EASy evolution, and ACN1762 is a reconstructed strain. **B.** Chromosomal copy number of F<sub>62</sub>, was monitored by qPCR for samples taken during continuous culturing of ACN1690. Because F<sub>62</sub> cannot be detected in strains with the 168 bp deletion, copy number drops to zero when most of the cells in the population have been selected to encode the fused protein. **C.** PCR was used to analyze genomic DNA from samples of the evolving population of ACN1690. Letters marking the lanes in panel C correspond to the samples analyzed by qPCR for F<sub>62</sub> in panel B. In samples A through O, two PCR products were evident: Fragment 1 (249-bp), the parent strain configuration, and Fragment 2 (81-bp), carrying the 168 bp deletion. Fragment 2 predominated at later time points. In the right-most lane, template DNA from ACN1762 was used.

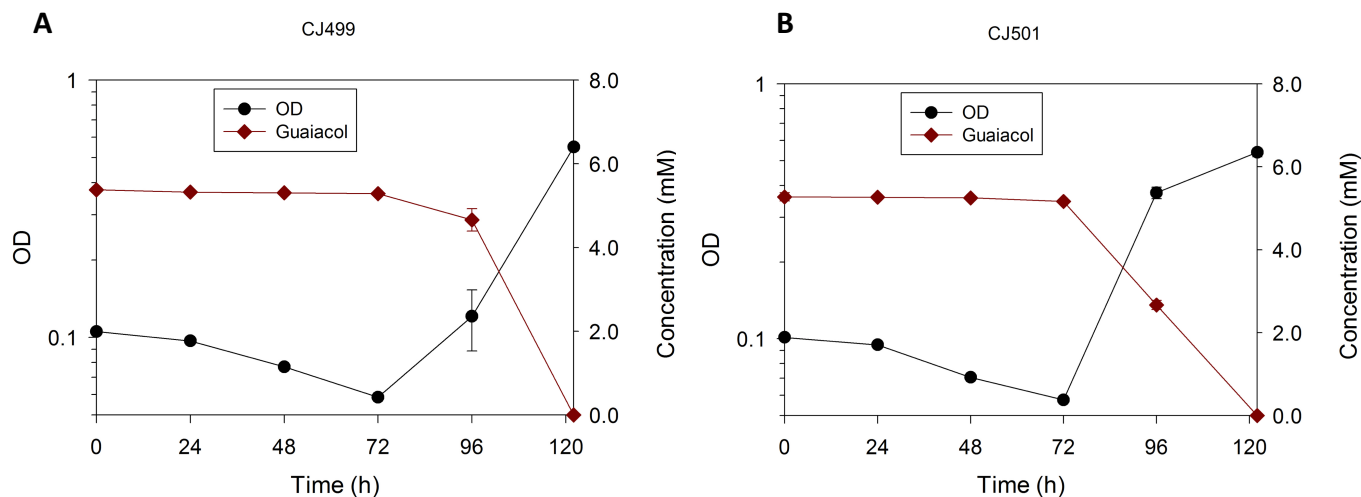

**Fig. S8. Growth on guaiacol (6 mM) as the sole carbon source by *P. putida* strains with *catA-gcoA* and *gcoB* genes integrated in the chromosome.** **A.** Unlike the results when *gcoA* and *gcoB* were chromosomally located as separate genes, the fused gene, *catA-gcoA*, and *gcoB* enabled a KT2440-derived strain, CJ499, to consume guaiacol as the sole carbon source, after a lag. **B.** Another KT2440-derived strain, CJ501, differs from CJ499 because it carries a deletion of a second *catA2*. In *P. putida* there are two *catA* genes. In CJ501 the fused *catA-gcoA* is the only gene encoding catechol 1,2-dioxygenase. The concentration of guaiacol in the culture supernatant was analyzed using HPLC. Growth was assessed by OD at 600 nm. Data points represent averages of 3 biological replicates, and error bars indicate the standard deviations of the measurements.

**Table S1. Sequences with homology to N-terminal residues from a guaiacol *O*-demethylating cytochrome P450**

| Bacterium                                           | Amino acids in protein | NCBI identifier              | % identity to the N-terminal query sequence <sup>a</sup> | % identity to WP_006553158.1 | Protein classification |
|-----------------------------------------------------|------------------------|------------------------------|----------------------------------------------------------|------------------------------|------------------------|
| <i>Rhodococcus pyridinivorans</i> AK37 <sup>a</sup> | 403                    | EHK82401.1<br>WP_006553158.1 | 100                                                      | 100                          | CYP255A4               |
| <i>Rhodococcus jostii</i> RHA1                      | 403                    | WP_011595125.1               | 85.7                                                     | 75.9                         | CYP255A2               |
| <i>Amycolatopsis</i> sp. ATCC 39116 <sup>b</sup>    | 407                    | WP_020419855.1               | 61.9                                                     | 76.4                         | CYP255A6               |

<sup>a</sup> The query sequence used for the NCBI BLAST program<sup>9</sup> was MTSTLSWLDEITMEELERNPY, which was determined for a guaiacol *O*-demethylating cytochrome P450 from *Rhodococcus rhodochrous* strain 116, P450<sub>RR1</sub>.<sup>10</sup>

<sup>b</sup> Previously known as *Streptomyces setonii* or *Streptomyces griseus* strain 75iv2



| Table S2. <i>Acinetobacter baylyi</i> <sup>a</sup> and <i>Pseudomonas putida</i> strains |                                                                                                                                                                                                                                                                                                                             | Source     |
|------------------------------------------------------------------------------------------|-----------------------------------------------------------------------------------------------------------------------------------------------------------------------------------------------------------------------------------------------------------------------------------------------------------------------------|------------|
| Relevant Characteristics                                                                 |                                                                                                                                                                                                                                                                                                                             |            |
| <b><i>A. baylyi</i> strains</b>                                                          |                                                                                                                                                                                                                                                                                                                             |            |
| ADP1                                                                                     | Wild type (BD413)                                                                                                                                                                                                                                                                                                           | 11,12      |
| ACN1643                                                                                  | ACIAD1443:: <i>sacB</i> -Km <sup>R</sup> 51643; counter-selectable marker inserted downstream of <i>catA</i> to facilitate subsequent strain construction<br>pBAC1215/AatII X ADP1 <sup>b</sup> selected by Km <sup>R</sup>                                                                                                 | This study |
| ACN1661                                                                                  | ACIAD1443:: <i>gcoAB</i> 51661; pCJ021 served as the <i>gcoAB</i> gene source<br>pBAC1255/EcoRI X ACN1643 <sup>b</sup> selected by growth in the presence of sucrose                                                                                                                                                        | This study |
| ACN1667                                                                                  | ACIAD1443:: <i>gcoAB</i> 51661; Km <sup>R</sup> 51667 (ΩK <sup>d</sup> cassette inserted downstream of <i>gcoB</i> ), Gua <sup>-</sup> parent strain single copy of <i>gcoAB</i> region<br>pBAC1261/EcoRI X ACN1661 <sup>b</sup> selected by Km <sup>R</sup>                                                                | This study |
| ACN1676                                                                                  | ACIAD1443:: <i>gcoAB</i> 51661; Km <sup>R</sup> 51667; multiple chromosomal copies of a 9.7 kbp amplicon including <i>gcoAB</i> (see Fig. S5); SBF51676 <sup>c</sup> ,<br>pBAC1262/EcoRI X ACN1667 <sup>b</sup> selected by high-level Km <sup>R</sup> , Gua <sup>-</sup>                                                   | This study |
| ACN1686                                                                                  | ACIAD1443:: <i>gcoAB</i> 51661; Km <sup>R</sup> 51667; SBF51676 <sup>c</sup> multiple copies of 9.7 kbp amplicon<br>Derived from ACN1676 by direct selection on a guaiacol plate, Gua <sup>+</sup>                                                                                                                          | This study |
| ACN1687                                                                                  | ACIAD1443:: <i>gcoAB</i> 51661; Km <sup>R</sup> 51667; SBF51676 <sup>c</sup> multiple copies of 9.7 kbp amplicon<br>Derived from ACN1676 by direct selection on a guaiacol plate, Gua <sup>+</sup>                                                                                                                          | This study |
| ACN1690                                                                                  | ACIAD1443:: <i>gcoAB</i> 51661; Km <sup>R</sup> 51667; SBF51676 <sup>c</sup> multiple copies of 9.7 kbp amplicon<br>Derived from ACN1676 by direct selection on a guaiacol plate, Gua <sup>+</sup>                                                                                                                          | This study |
| ACN1738                                                                                  | <i>catA-gcoA</i> 51738; <i>gcoB</i> 51661; Km <sup>R</sup> 51667; EASy-derived Gua <sup>+</sup> isolate from evolving population of ACN1687 (see Fig. S5)                                                                                                                                                                   | This study |
| ACN1739                                                                                  | <i>catA-gcoA</i> 51738; <i>gcoB</i> 51661; Km <sup>R</sup> 51667; Reconstructed strain, Gua <sup>+</sup><br>pBAC1314/NdeI X ADP1 <sup>b</sup> selected by Km <sup>R</sup>                                                                                                                                                   | This study |
| ACN1762                                                                                  | <i>catA-p-gcoA</i> 51764; <i>gcoB</i> 51661; Km <sup>R</sup> 51667; Reconstructed strain, Gua <sup>+</sup><br>pBAC1337/NdeI X ADP1 <sup>b</sup> selected by Km <sup>R</sup>                                                                                                                                                 | This study |
| ACN1764                                                                                  | <i>catA-p-gcoA</i> 51764; <i>gcoB</i> 51661; Km <sup>R</sup> 51667; EASy-derived Gua <sup>+</sup> isolate from evolving population of ACN1690 (see Fig. S5)                                                                                                                                                                 | This study |
| ACN1850                                                                                  | ACIAD1443:: <i>gcoA</i> 51850 [encodes GcoA(G72D)], <i>gcoB</i> 51850 [encodes GcoB(A4T)]; Km <sup>R</sup> 51667; EASy-derived Gua <sup>+</sup> isolate from evolving population of ACN1686<br>Mutations identified in genome outside the <i>gcoAB</i> region (see Table S4)                                                | This study |
| ACN1863                                                                                  | ACIAD1443:: <i>gcoA</i> 51661, <i>gcoB</i> 51850 [encodes GcoB(A4T)]; Km <sup>R</sup> 51667; Reconstructed strain, Gua <sup>-</sup><br>pBAC1446/NdeI X ADP1 <sup>b</sup> selected by Km <sup>R</sup>                                                                                                                        | This study |
| ACN1881                                                                                  | ACIAD1443:: <i>gcoA</i> 51850 [encodes GcoA(G72D)], <i>gcoB</i> 51661; Km <sup>R</sup> 51667; Reconstructed strain, Gua <sup>-</sup><br>pBAC1456/NdeI X ADP1 <sup>b</sup> selected by Km <sup>R</sup>                                                                                                                       | This study |
| ACN1886                                                                                  | ACIAD1443:: <i>gcoA</i> 51850 [encodes GcoA(G72D)], <i>gcoB</i> 51850 [encodes GcoB(A4T)]; Km <sup>R</sup> 51667; Reconstructed strain, Gua <sup>-</sup><br>pBAC1459/NdeI X ADP1 <sup>b</sup> selected by Km <sup>R</sup>                                                                                                   | This study |
| ACN1887                                                                                  | <i>catA-p-gcoA</i> 51887; <i>gcoB</i> 51661; Km <sup>R</sup> 51667; Reconstructed strain, Gua <sup>-</sup> introduces the 342-bp deletion encoding a fused protein observed in the evolving population of ACN1687 (corresponding to fragment 2 in Fig. 3)<br>pBAC1479/AatII X ADP1 <sup>b</sup> selected by Km <sup>R</sup> | This study |
| <b><i>P. putida</i> strains</b>                                                          |                                                                                                                                                                                                                                                                                                                             |            |
| KT2440                                                                                   | Wild type                                                                                                                                                                                                                                                                                                                   | ATCC 47054 |
| CJ499                                                                                    | <i>catA:gcoAB</i> ( <i>catA-gcoA</i> fused), Gua <sup>+</sup>                                                                                                                                                                                                                                                               | This study |

| Table S2. <i>Acinetobacter baylyi</i> <sup>a</sup> and <i>Pseudomonas putida</i> strains (continued) |                                                                                                | Source     |
|------------------------------------------------------------------------------------------------------|------------------------------------------------------------------------------------------------|------------|
| Relevant characteristics and descriptions                                                            |                                                                                                |            |
| CJ501                                                                                                | $\Delta catA2$ <i>catA:gcoAB</i> ( <i>catA-gcoA</i> fused gene), Gua <sup>+</sup>              | This study |
| CJ514                                                                                                | $\Delta catRBC::Ptac:catA:gcoAB$ , converts guaiacol to muconate                               | This study |
| CJ516                                                                                                | $\Delta catRBC::Ptac:catA:gcoAB$ ( <i>catA-gcoA</i> fused gene), converts guaiacol to muconate | This study |

<sup>a</sup> *A. baylyi* strains were derived from ADP1, previously known as *Acinetobacter calcoaceticus* or *Acinetobacter* sp.<sup>12</sup>

<sup>b</sup> In strains constructed by allelic replacement, blue text indicates the donor DNA and the restriction enzyme used to linearize the plasmid (pBAC number/Enzyme). The donor DNA transformed (X) the indicated recipient strain.

<sup>c</sup> The synthetic bridging fragment (SBF51676) corresponds to linearized pBAC1262

<sup>d</sup>  $\Omega$ K indicates the omega drug-resistance cassette for Km<sup>R</sup> from pUI1637

| Table S3. Plasmids |                                                                                                                                                                                                                                                                                                                                      |            |
|--------------------|--------------------------------------------------------------------------------------------------------------------------------------------------------------------------------------------------------------------------------------------------------------------------------------------------------------------------------------|------------|
| Plasmid            | Relevant characteristics                                                                                                                                                                                                                                                                                                             | Source     |
| pUC18, pUC19       | Ap <sup>R</sup> ; cloning vectors                                                                                                                                                                                                                                                                                                    | 13         |
| pUI1637            | Source of omega Km <sup>R</sup> cassette                                                                                                                                                                                                                                                                                             | 14         |
| pRMJ1              | Source of <i>sacB</i> -Km <sup>R</sup> cassette                                                                                                                                                                                                                                                                                      | 15         |
| pBAC1152           | Ap <sup>R</sup> ; SacI-SphI DNA from ADP1 (1,440,498-1,442,424) <sup>a</sup> , PCR product (primers ST69 and ST70) in pUC19 (partial <i>catA</i> , ACIAD1443, partial ACIAD1444)                                                                                                                                                     | This study |
| pBAC1153           | Ap <sup>R</sup> ; Changed GGATCA (1,441,335-1,441,340) <sup>a</sup> in ACIAD1443 on pBAC1152 to GGATCC (BamHI site) by site-directed mutagenesis. This change encodes a P instead of Q in the encoded protein.                                                                                                                       | This study |
| pBAC1215           | Ap <sup>R</sup> , Km <sup>R</sup> ; ACIAD1443:: <i>sacB</i> -Kan <sup>R</sup> 51643; <i>sacB</i> -Km <sup>R</sup> excised from pRMJ1 as a BamHI fragment, inserted into the BglII site of pBAC1152                                                                                                                                   | This study |
| pBAC1250           | Ap <sup>R</sup> ; Derived from pBAC1153 by site-directed mutagenesis to introduce two restriction sites. An EcoRV site (GATATC) was created (T→C, 1,441,050 <sup>a</sup> ) with primers MTV343 and MTV344. An SpeI site (ACTAGT) was created (C→G, 1,441,024 <sup>a</sup> ) with primers MTV341 and MTV342.                          | This study |
| pBAC1255           | Ap <sup>R</sup> ; ACIAD1443:: <i>gcoAB</i> 51661; <i>gcoAB</i> DNA was excised from pCJ021 by digestion with XbaI and EcoRV and ligated to pBAC1250 digested with SpeI and EcoRV. <i>gcoAB</i> are inserted in <i>A. baylyi</i> DNA downstream of <i>catA</i> .                                                                      | This study |
| pBAC1261           | Ap <sup>R</sup> , Km <sup>R</sup> ; ACIAD1443:: <i>gcoAB</i> 51661; Km <sup>R</sup> 51667; $\Omega$ Km <sup>R</sup> cassette was excised from pUI1637 as an EcoRV fragment and ligated to EcoRV-digested pBAC1255                                                                                                                    | This study |
| pBAC1262           | Ap <sup>R</sup> ; SBF51676. ACIAD1444 region (1,442,139-1,443,156) <sup>a</sup> upstream of <i>benE</i> region (1,438,049-1,439,238) <sup>a</sup> , constructed by SOEing <sup>20</sup> PCR using primers MTV362-MTV365 cloned into SacI and PstI sites of pUC18                                                                     | This study |
| pBAC1278           | Ap <sup>R</sup> ; Made by excising the internal EcoRI fragment of pBAC1261; carries part of ACIAD1443 and ACIAD1444 from pBAC1261. Also carries EcoRV and BamHI sites introduced by site directed mutagenesis (see pBAC1153 and pBAC1250). Used to construct the gap-repair plasmid pBAC1282.                                        | This study |
| pBAC1280           | Ap <sup>R</sup> ; <i>catA</i> -ACIAD1443 region (1,439,827-1,441,020) <sup>a</sup> with an engineered stop codon [TGA] introduced by changing C→T at position 1,441,018. <sup>a</sup> cloned into EcoRI and EcoRV sites of pBAC1278 by incorporating these same sites at the ends of this region with PCR primers MTV388 and MTV390. | This study |
| pBAC1282           | Ap <sup>R</sup> , Km <sup>R</sup> ; $\Omega$ Kan <sup>R</sup> cassette from pUI1637 cut by Ecl136II and XmnI was cloned into EcoRV-digested pBAC1280. This plasmid, linearized with XbaI and EcoRV, allows capture of the <i>A. baylyi</i> chromosomal region containing <i>gcoAB</i> using the gap-repair method.                   | This study |
| pBAC1314           | Ap <sup>R</sup> , Km <sup>R</sup> ; <i>catA-gcoA</i> 51738; <i>gcoB</i> 51661; Km <sup>R</sup> 51667; DNA recovered from ACN1738 by the gap-repair method using linearized pBAC1282                                                                                                                                                  | This study |

| Table S3. Plasmids (continued) |                                                                                                                                                                                                                                                                                                                                                                                                                                                                                                                                                                                |            |
|--------------------------------|--------------------------------------------------------------------------------------------------------------------------------------------------------------------------------------------------------------------------------------------------------------------------------------------------------------------------------------------------------------------------------------------------------------------------------------------------------------------------------------------------------------------------------------------------------------------------------|------------|
| Plasmid                        | Relevant characteristics                                                                                                                                                                                                                                                                                                                                                                                                                                                                                                                                                       | Source     |
| pBAC1337                       | Ap <sup>R</sup> , Km <sup>R</sup> ; <i>catA-p-gcoA51764</i> ; <i>gcoB51661</i> ; Km <sup>R</sup> 51667; DNA recovered from ACN1764 by the gap-repair method using linearized pBAC1282                                                                                                                                                                                                                                                                                                                                                                                          | This study |
| pBAC1446                       | Ap <sup>R</sup> , Km <sup>R</sup> ; <i>gcoB51850</i> ; [encodes GcoB(A4T)] made by replacing the SbfI-PspOMI fragment of pBAC1261 with comparable DNA carrying the <i>gcoB</i> mutation discovered in ACN1850                                                                                                                                                                                                                                                                                                                                                                  | This study |
| pBAC1456                       | Ap <sup>R</sup> , Km <sup>R</sup> ; ACIAD1443:: <i>gcoA51850</i> ; [encodes GcoB(A4T)] made by replacing the SbfI-BsiWI fragment of pBAC1261 with comparable DNA carrying the <i>gcoA</i> mutation discovered in ACN1850                                                                                                                                                                                                                                                                                                                                                       | This study |
| pBAC1459                       | Ap <sup>R</sup> , Km <sup>R</sup> ; ACIAD1443:: <i>gcoA51850</i> ; <i>gcoB51850</i> [encodes GcoA(G72D) and GcoB(A4T)] constructed by replacing the BbvCI-BsiWI fragment of pBAC1261 with comparable DNA carrying both mutations discovered in ACN1850                                                                                                                                                                                                                                                                                                                         | This study |
| pBAC1479                       | Ap <sup>R</sup> , Km <sup>R</sup> ; <i>catA-p-gcoAB51887</i> ; <i>gcoB51661</i> ; Km <sup>R</sup> 51667; the deletion revealed by Fragment 2 at day 23 (Sample B) in the evolving ACN1687 culture (Figure 3C) was reconstructed on a plasmid. A PCR product (generated with primers MTV388 and MTV704) was isolated and digested with BsiWI and EcoRI. This DNA was cloned by ligating to DNA with the same sequence as the largest fragment resulting from digestion of pBAC1337 with BsiWI and EcoRI. Essentially this method swaps the DNA sequence of the tethered fusion. | This study |
| pBTL-2                         | Km <sup>R</sup> ; pBBR1-based broad host range plasmid used for expression in <i>P. putida</i> KT2440. (Addgene plasmid # 22806). A gift from Ryan Gill.                                                                                                                                                                                                                                                                                                                                                                                                                       | 16         |
| pCJ004                         | Cm <sup>R</sup> , Tc <sup>R</sup> ; For deletion of <i>catA2</i> in <i>P. putida</i> KT2440                                                                                                                                                                                                                                                                                                                                                                                                                                                                                    | 17         |
| pCJ021                         | Km <sup>R</sup> ; The genes encoding GcoA (WP_020419855.1) and GcoB (WP_020419854.1) were amplified from <i>Amycolatopsis</i> sp. ATCC 39116 gDNA with primers oCJ169 and oCJ170 (2,291 bp) and assembled into pBTL-2 amplified linearly with primers oCJ160 and oCJ161 (2,595 bp).                                                                                                                                                                                                                                                                                            | This study |
| pCJ114                         | Km <sup>R</sup> ; The genes encoding GcoA (WP_011595125.1) and GcoB (WP_011595126) were amplified from <i>Rhodococcus jostii</i> RHA1 gDNA with primers oCJ173 and oCJ174 (2262 bp) and assembled into pBTL-2 amplified linearly with primers oCJ160 and oCJ161 (2,595 bp).                                                                                                                                                                                                                                                                                                    | This study |
| pCJ120                         | Km <sup>R</sup> ; The genes encoding GcoA (EHK82401) and GcoB (EHK82400) from <i>Rhodococcus pyridinivorans</i> AK37 were codon optimized for expression in <i>P. putida</i> KT2440 and synthesized as two dsDNA fragments (1,159 and 1,160 bp) by SGI-DNA and assembled into pBTL-2 amplified linearly with primers oCJ160 and oCJ161 (2,595 bp).                                                                                                                                                                                                                             | This study |
| pCJ121                         | Km <sup>R</sup> ; Plasmid for integration of genes encoding the CYP255A guaiacol O-demethylase and reductase from <i>Amycolatopsis</i> sp. ATCC39116 downstream of <i>catA</i> in <i>P. putida</i> KT2440. The genes encoding GcoA (WP_020419855.1) and GcoB (WP_020419854.1) were amplified from <i>Amycolatopsis</i> sp. ATCC 39116 gDNA with primers oCJ617/oCJ618 (2,308 bp) and assembled into pMFL56, <sup>18</sup> which contains the targeting regions for integration downstream of <i>catA</i> , amplified linearly with oCJ615 and oCJ616 (7,655 bp).               | This study |
| pCJ126                         | Km <sup>R</sup> ; Plasmid for integration of genes encoding the CYP255A guaiacol O-demethylase and reductase from <i>Amycolatopsis</i> sp. ATCC39116 downstream of <i>catA</i> in <i>P. putida</i> KT2440, with <i>gcoA</i> fused to <i>catA</i> . The fusion was created by amplifying pCJ121 with primers oCJ619 and oCJ620 (9,878 bp) and using the Q5 Site-Directed Mutagenesis Kit (New England Biolabs) to circularize the product according to the manufacturer's instructions.                                                                                         | This study |
| pMFL22                         | Cm <sup>R</sup> , Tc <sup>R</sup> ; For deletion of <i>catBC</i> and integration of the tac promoter upstream of <i>catA</i> in <i>P. putida</i> KT2440.                                                                                                                                                                                                                                                                                                                                                                                                                       | 18         |
| pCJ021                         | Km <sup>R</sup> ; The genes encoding GcoA (WP_020419855.1) and GcoB (WP_020419854.1) were amplified from <i>Amycolatopsis</i> sp. ATCC 39116 gDNA with primers oCJ169 and oCJ170 (2,291 bp) and assembled into pBTL-2 amplified linearly with primers oCJ160 and oCJ161 (2,595 bp).                                                                                                                                                                                                                                                                                            | This study |

<sup>a</sup>Genomic positions in ADP1 (NCBI reference NC\_005966)

Table S4. Primers

| Name   | Sequence (5' → 3')                             | Uses and Notes                                                                                                                                                                                  |
|--------|------------------------------------------------|-------------------------------------------------------------------------------------------------------------------------------------------------------------------------------------------------|
| MTV274 | GCTCGACGCCTTCTATTTC                            | For <i>rpoA</i> copy number analysis; used with MTV275 for qPCR                                                                                                                                 |
| MTV275 | TTTACGTCGCATTCTATTGTCTTCTT                     | For <i>rpoA</i> copy number analysis; used with MTV274 for qPCR                                                                                                                                 |
| MTV302 | GCGTTGGCTACCCGTGATA                            | For Km copy number analysis; used with MTV303 for qPCR                                                                                                                                          |
| MTV303 | GGAAGCGGTCAGCCATT                              | For Km copy number analysis; used with MTV302 for qPCR                                                                                                                                          |
| MTV341 | TCATGGTAAAAGCCGACTAGTCAATGAGCTG<br>ATCG        | With MTV342 for C → G mutagenesis; creates <b>SpeI</b> site to change pBAC1153 to pBAC1250                                                                                                      |
| MTV342 | CGATCAGCTCATTGACTAGTCGGCTTTTACC<br>TGA         | With MTV341 for C → G mutagenesis; creates <b>SpeI</b> site to change pBAC1153 to pBAC1250                                                                                                      |
| MTV343 | ATGAGCTGATCGGGACAGATATCTTTTCTGT<br>TGCCG       | With MTV344 for T → C mutagenesis; creates <b>EcoRV</b> site to change pBAC1153 to pBAC1250                                                                                                     |
| MTV344 | CGGCAACAGAAAAAGATATCTGTCCCGATCAG<br>CTCAT      | With MTV343 for T → C mutagenesis; creates <b>EcoRV</b> site to change pBAC1153 to pBAC1250                                                                                                     |
| MTV357 | CTGGGGGCTGGGGCTTCC                             | With MTV358 amplifies 468 bp of <i>gcoAB</i> region                                                                                                                                             |
| MTV358 | CGACCAGCTCGACGTACTGC                           | With MTV357 amplifies 468 bp of <i>gcoAB</i> region                                                                                                                                             |
| MTV362 | GAGTCAGAGCTCACATCAATTGTTTATCGA<br>AC           | Used to make SBF (pBAC1262); with MTV363 amplifies 1018 bp of ACIAD1444; <b>SacI</b> site                                                                                                       |
| MTV363 | GTTTTTAAACAGGGTTGTCATGGTAAAACCTT<br>AAACCTTCAA | Used to make SBF (pBAC1262); with MTV362 amplifies 1018 bp of ACIAD1444; overlapping sequence ( <i>benE</i> ) for SOEing <sup>20</sup> PCR                                                      |
| MTV364 | TTGAAGGTTTAAAGGTTTACCATGACAACCC<br>TGTTAAAAAC  | Used to make SBF (pBAC1262); with MTV365 amplifies 1190 bp of <i>benE</i> ; overlapping sequence (ACIAD1444) for SOEing <sup>20</sup> PCR                                                       |
| MTV365 | GATGATCTGCAGTTAGTTAGCTGGCTTTGG                 | Used to make SBF (pBAC1262); with MTV364 amplifies 1190 bp of <i>benE</i> ; <b>PstI</b> site                                                                                                    |
| MTV379 | TTTAAGCGTATTGCCGAATCAG                         | For fragment 62 (F <sub>62</sub> ) copy number analysis. Used with MTV380 for qPCR                                                                                                              |
| MTV380 | CAAACGTCATCAGACGAACCA                          | For fragment 62 (F <sub>62</sub> ) copy number analysis. Used with MTV379 for qPCR                                                                                                              |
| MTV388 | GAGTCAGAATTCGGCGATTTC                          | Used with MTV390 to amplify <i>catA</i> -ACIAD1443 DNA and to introduce an <b>EcoRI</b> site for cloning. Also used with MTV704 to amplify fragment 2 (Figure 3C) for construction of pBAC1479. |
| MTV390 | GATGATGATATCTCAGCTTTTACCATGATTA<br>TATTTACC    | Used with MTV388 to amplify <i>catA</i> -ACIAD1443 DNA and introduce a stop codon in ACIAD1443. Introduces an <b>EcoRV</b> site for cloning; C → T at position 1,441,018                        |
| MTV459 | GATGATCTAGATTACACCGCTAGACGTG                   | Used with MTV388 to amplify <i>catA</i> region and to introduce an <b>XbaI</b> site for cloning                                                                                                 |
| MTV704 | AGCCGCTCGTACACCTCGTA                           | Used with MTV388 to amplify fragment 2 (Figure 3C) from DNA of evolving ACN1687 (isolated at day 23). Used to make pBAC1479                                                                     |
| MTV706 | ATCAGACGAACCAAGCGTG                            | Binds to ACIAD1443. Used with MTV707 to detect deletions that occur during evolution, including some that create tethered fusions ( <i>catA-p-gcoA</i> ).                                       |
| MTV707 | CGATCTAAAATTGACGCGTTG                          | Binds to <i>catA</i> . Used with MTV706 to detect deletions that occur during evolution, including some that create tethered fusions ( <i>catA-p-gcoA</i> ).                                    |
| MTV714 | CGACCCAACAGGCGAGCAGCA                          | Binds to <i>catA</i> . With MTV715 used to detect deletions that occur during EASy evolution of strains growing on guaiacol.                                                                    |
| MTV715 | CGAGATCGGGCCGTTCCGGTTGG                        | With MTV714 used to detect deletions that occur during EASy evolution of strains growing on guaiacol.                                                                                           |
| MTV751 | GAGATCGGGCCGTTCCGGT                            | Binds to <i>gcoA</i> . With MTV770 used to detect deletions that occur during evolution, including some that create fusions ( <i>catA-gcoA</i> or <i>catA-p-gcoA</i> ).                         |
| MTV770 | TGCTGAATCAGTTGGGCCG                            | Binds to <i>catA</i> . With MTV751 used to detect deletions that occur during evolution, including some that create fusions ( <i>catA-gcoA</i> or <i>catA-p-gcoA</i> ).                         |
| ST69   | GTTATCGAGCTCATGGTAACCGCCCTG                    | With ST70 amplifies region between <i>catA</i> -ACIAD1444 (1,440,498-1,442,425). ST69 introduces a <b>SacI</b> site to <i>catA</i> . Used to make pBAC1152                                      |
| ST70   | GTCTAAGCATGCAAGCAACATCACCCGATC                 | With ST69 amplifies region between <i>catA</i> -ACIAD1444 (1,440,498-1,442,425). ST70 introduces a <b>SphI</b> site to ACIAD1444 Used to make pBAC1152                                          |

| Table S4. Primers (continued) |                                                                               |                                                                                                                                                                                                                                                                                                                                          |
|-------------------------------|-------------------------------------------------------------------------------|------------------------------------------------------------------------------------------------------------------------------------------------------------------------------------------------------------------------------------------------------------------------------------------------------------------------------------------|
| Name                          | Sequence (5' → 3')                                                            | Uses and Notes                                                                                                                                                                                                                                                                                                                           |
| ST71                          | GATCAGATACC <b>GGATCC</b> GACAATTTTAACCC<br>AG                                | Used with ST72 to introduce a <b>BamHI</b> site in pBAC1153                                                                                                                                                                                                                                                                              |
| ST72                          | CTGGGTTAAAATTGTC <b>GGATCC</b> GGTATCTGA<br>TC                                | Used with ST71 to introduce a <b>BamHI</b> site in pBAC1153                                                                                                                                                                                                                                                                              |
| oCJ160                        | GATATCATTCAGGACGAGCCTCAGACTCC                                                 | Forward primer for linear amplification of pBTL-2                                                                                                                                                                                                                                                                                        |
| oCJ161                        | CTCTAGAGTGTGAAATTGTTATCCGCTCACA<br>ATTCC                                      | Reverse primer for linear amplification of pBTL-2                                                                                                                                                                                                                                                                                        |
| oCJ169                        | <u>aacaatttcacacTCTAGAgAGGAGGACAGC</u><br><u>TATGACGACGCCGAACGGCC</u>         | Forward primer for amplification of the genes encoding GcoA and GcoB from <i>Amycolatopsis</i> sp. ATCC 39116 gDNA, incorporating a Shine-Dalgarno consensus RBS and overlapping sequence for assembly into pBTL-2                                                                                                                       |
| oCJ170                        | <u>ggctcgtcctgaatGATATCTCACGAGGCCG</u><br>GCGTG                               | Reverse primer for amplification of the genes encoding GcoA and GcoB from <i>Amycolatopsis</i> sp. ATCC 39116 gDNA with overlapping sequence for assembly into pBTL-2                                                                                                                                                                    |
| oCJ173                        | <u>aacaatttcacacTCTAGAgAGGAGGACAGC</u><br><u>TATGACGCCACCCCTGTCTGG</u>        | Forward primer for amplification of the genes encoding GcoA and GcoB from <i>R. jostii</i> RHA1 gDNA, incorporating a Shine-Dalgarno consensus RBS and overlapping sequence for assembly into pBTL-2                                                                                                                                     |
| oCJ174                        | <u>ggctcgtcctgaatGATATCTCACGCGCGG</u><br>GCG                                  | Reverse primer for amplification of the genes encoding GcoA and GcoB from <i>R. jostii</i> RHA1 gDNA with overlapping sequence for assembly into pBTL-2                                                                                                                                                                                  |
| oCJ615                        | gttcgaggttatgtcactgtgattttgctg                                                | Forward primer for amplification of the downstream targeting region for integration downstream of <i>catA</i> from pMFL56                                                                                                                                                                                                                |
| oCJ616                        | CTCGAGtcagccctcctgcaac                                                        | Reverse primer for amplification of the upstream targeting region for integration downstream of <i>catA</i> from pMFL56                                                                                                                                                                                                                  |
| oCJ617                        | <u>cgcgggcgttgccaggggctgaCTCGAGAG</u><br><u>GAGGTAATACatgacgacgaccgaacggc</u> | Forward primer for amplification of the genes encoding GcoA and GcoB from <i>Amycolatopsis</i> sp. ATCC 39116, incorporating a RBS calculated using the Salis RBS calculator <sup>19</sup> and overlapping sequence for assembly with the upstream targeting region for integration downstream of <i>catA</i> in <i>P. putida</i> KT2440 |
| oCJ618                        | <u>aggcaaaatcacagtgacataaacctcgaacG</u><br><b>TTTAAAC</b> tcacgaggccggcgtgaac | Reverse primer for amplification of the genes encoding GcoA and GcoB from <i>Amycolatopsis</i> sp. ATCC 39116 with a <b>PmeI</b> site and overlapping sequence for assembly with the downstream targeting region for integration downstream of <i>catA</i> in <i>P. putida</i> KT2440                                                    |
| oCJ619                        | accgaacggcccgatctcg                                                           | Forward primer for site directed mutagenesis of pCJ121 to generate the CatA-GcoA fusion in <i>P. putida</i> KT2440                                                                                                                                                                                                                       |
| oCJ620                        | cgccctcggcgtcaggc                                                             | Forward primer for site directed mutagenesis of pCJ121 to generate the CatA-GcoA fusion in <i>P. putida</i> KT2440                                                                                                                                                                                                                       |

| Table S5. Synthesized dsDNA fragments containing genes encoding GcoA and GcoB <i>Rhodococcus pyridinivorans</i> AK37, optimized for expression in <i>P. putida</i> KT2440 |                                                                                                                                                                                                                                                                                                                                                                                                                                                                                                                                                                                                                                                                                                                                                                                                                                                                                                                                                                                                                                                                                                                                                                                                                 |
|---------------------------------------------------------------------------------------------------------------------------------------------------------------------------|-----------------------------------------------------------------------------------------------------------------------------------------------------------------------------------------------------------------------------------------------------------------------------------------------------------------------------------------------------------------------------------------------------------------------------------------------------------------------------------------------------------------------------------------------------------------------------------------------------------------------------------------------------------------------------------------------------------------------------------------------------------------------------------------------------------------------------------------------------------------------------------------------------------------------------------------------------------------------------------------------------------------------------------------------------------------------------------------------------------------------------------------------------------------------------------------------------------------|
| Name                                                                                                                                                                      | Sequence (5' → 3'). Overlaps for assembly together into pBTL-2 are in gray, RBSs calculated using the Salis <sup>19</sup> RBS calculator are <u>underlined</u> , and start and stop codons are in <b>bold</b> .                                                                                                                                                                                                                                                                                                                                                                                                                                                                                                                                                                                                                                                                                                                                                                                                                                                                                                                                                                                                 |
| Fragment 1 (GcoA)                                                                                                                                                         | gtgagcggataaacaatttcacacTCTAGAgGACGAAAGTATT <b>atg</b> accagcaccctctcgtggctcgacgagatcaccatggaggagctggagcg taaccCGTatccGGTgtacgaacgtctgCGcgcagaagcaccagtgGCctttgttccagtgctgggCGcctatgtggccagTaccactgaagcct gccgtgcagtagcagccggcgatgatttcgacggcatcatcaccCCagccggTggtcgtaccttcGGTcatccagccatcatcggcgtgaacggc gacatccatcgcgatctgCGcagcatggtggaaccagcactgcaaccagccgaggtggatcgTTggatcgaggatctggtgCGcccaattgcccG ccgttacgtagaagccttcgagagcgatggcCGcgcagatttggTggcccaattctgCGaaaccggtgagcgtgCGtagcctgggtgatttGctgg gcctgaaggacgtgagcagcgacaaactgCGcagtggttccacaagctgagCGacagcttcaccaacCGccatggacgaagacggcaacttc ctgaaccagagcgccttcgacgagggcgatcgtGccaaggaagatccgtagcgtggtggatccgctgatcgaccactggatcgaaacccCGga cgatagcgcctatcgccattggctgatgacggtatgCCggaaggccaaaccCGcgcgactacatctatccgaccctgtacgtgttccTgc tgggCGcaatgcaggaaccgggtcatgcaatgagcagcaccctggcaggcctgttaccCGtccggaacagttcgaagccgtggtggatgaaccG ggccTgattccacgtGCCatcgagaagcatgCGctggactgccccaaatttgagTggtaccgcccgtatcgccaagcgtgatccgTggtgag cggcatcgagatcagcgaaggtagcgtggtgatgctgagctacggtagCGccaaccacgacatcgacgtgttcgatgccccgagccgctacgatt tgaccagaccaccactgCCgCACctggcctttggTgcagcGaaacatgatgCGccggcatctacttcGccaacaacgtgagccGcatCGgcctG gaagagctgttggagacca |
| Fragment 2 (GcoA, GcoB)                                                                                                                                                   | gcacCGcctggaagagctgttggagaccatcccgaacctggaacCGcgaaccagcgaagcgtggagttctggggttgggcttcagaggccccG aaaaccctgcatgcacgctgggagatc <b>tga</b> AGGAGGAGAACT <b>atg</b> ccgtacaccctcaccgctggaaccggTgttGtgcctatgcgaaccaggtcG taccgtgctggaagccttccTgctaacgGcaactggatGCCgaacagctgcaaccagggcaccTgtggtacctgcaagatcaaggtgctggacG gCGagctggaccatcgtaatagcccGgaagagaccctgaccCGcgaatttagcagccggttctgTgctggcctgccaagcaactccacgtggt gatTggccttcgaaaccCGaccgaagaaccagccggtaccatgtgctgCGcgaatgTggttGtgaaccgtgaccgaagTgCGcgaatTgc cGccgataccCGcaaagTgctgctgactgCCgacgaaccgctggaatttagCGccggccagTactgTgaggtgaccgtaccaggtaccgagatcc gTcGccagTaccagcctggccaatccaccaagCGagggccaaggaactggagctgcatatccgcccTcagccaggtggtgTggaagTgaatgggTg ttcgagcgcacTcgacgtggCGaacgtgtaaccGtaaccggcccgtatggcgaacttcacctcGacctggaaggcaccgaccgatTgtgtgct gggTggtgTaccggtcTgGcaccattggaagccatcgtgCGtcaagccctgagctTggtgCGgacTcagatctcTgctgtaccacggcgtgc gtacctgCGcagatctgtacgacgtggagTtccTgCGcagctggaaccCGccatcatggttccGctacatcaccTgctgagccCGaaagT attcaggacgagcctcagactcca                                                                                                                                                                                        |

**Table S6. Mutations in ACN1850 outside the *gcoAB* region<sup>a,b</sup>**

| Genes with mutations     | ADP1 Genome position of mutation <sup>c</sup> | Nucleotide change<br>Codon change  | Amino acid change<br>Position of change/<br>Total residues                                                                                                                   | Potential function of gene product                                                             |
|--------------------------|-----------------------------------------------|------------------------------------|------------------------------------------------------------------------------------------------------------------------------------------------------------------------------|------------------------------------------------------------------------------------------------|
| ACIAD1064                | 1,061,077                                     | C→T<br>GGC→GAC<br>(reverse strand) | G→D<br>141/312                                                                                                                                                               | Putative ester hydrolase (EstB)                                                                |
| <i>pbpA</i><br>ACIAD1101 | 1,091,644                                     | C→T<br>UGG→UAG<br>(reverse strand) | W→stop<br>366/675                                                                                                                                                            | Penicillin-Binding Protein 2                                                                   |
| <i>lon</i><br>ACIAD1115  | 1,103,385-<br>1,103,423                       | 39 bp deletion<br>(reverse strand) | In frame deletion of 13<br>residues<br>(EYFLNEKMKVIQR)<br>between R237 and<br>E251/808 aa WT protein                                                                         | DNA-binding ATP-dependent<br>protease                                                          |
| ACIAD1354                | 1,350,431                                     | G→A                                | W→stop<br>385/386                                                                                                                                                            | Putative phospholipase A1<br>precursor (PldA)                                                  |
| ACIAD1807                | 1,814,453-<br>1,814,499                       | 47 bp deletion                     | After Y238, frame shift<br>adds 5 residues (LGCKP)<br>and stop<br>386 aa WT protein                                                                                          | Dipeptidyl-aminopeptidase/<br>acylaminoacyl-peptidase                                          |
| ACIAD3076                | 3,003,892-<br>3,004,098                       | 207 bp deletion                    | Prevents translation<br>117 aa WT protein                                                                                                                                    | Small hypothetical protein of<br>unknown function (12 kDa)                                     |
| ACIAD3450                | 3,372,250                                     | 1 bp deletion                      | After G345, frame shift<br>adds 11 residues<br>(AFLAVRWVGN) and<br>stop<br>454 aa WT protein<br>frame shift occurs in the 11 <sup>th</sup><br>of 12 transmembrane<br>helices | Putative transport protein, unknown<br>function, major facilitator<br>superfamily (MFS) member |

<sup>a</sup>Mutations were identified as differences between the sequence of the parent strain and the evolved strain by whole genome resequencing

<sup>b</sup>Sequence changes were observed in 80% or more of the reads

<sup>c</sup>Numbers correspond to positions in the ADP1 genome deposited in NCBI (NC\_005966)

## REFERENCES

1. Sievers, F. *et al.* Fast, scalable generation of high-quality protein multiple sequence alignments using Clustal Omega. *Mol. Systems Biol.* **7**, 539 (2011).
2. The UniProt, C. UniProt: the universal protein knowledgebase. *Nucleic Acids Res.* **45**, D158-D169 (2017).
3. Bundy, B.M., Campbell, A.L. & Neidle, E.L. Similarities between the *antABC*-encoded anthranilate dioxygenase and the *benABC*-encoded benzoate dioxygenase of *Acinetobacter* sp. strain ADP1. *J. Bacteriol.* **180**, 4466-4474 (1998).
4. Eby, D.M., Beharry, Z.M., Coulter, E.D., Kurtz, D.M., Jr. & Neidle, E.L. Characterization and evolution of anthranilate 1,2-dioxygenase from *Acinetobacter* sp. strain ADP1. *J. Bacteriol.* **183**, 109-118 (2001).
5. Karlsson, A. *et al.* X-ray crystal structure of benzoate 1,2-dioxygenase reductase from *Acinetobacter* sp. strain ADP1. *J. Mol. Biol.* **318**, 261-272 (2002).
6. Larkin, M.A. *et al.* Clustal W and Clustal X version 2.0. *Bioinformatics* **23**, 2947-2948 (2007).
7. Robert, X. & Gouet, P. Deciphering key features in protein structures with the new ENDscript server. *Nucleic Acids Res.* **42**, W320-324 (2014).
8. Gregg-Jolly, L.A. & Ornston, L.N. Recovery of DNA from the *Acinetobacter calcoaceticus* chromosome by gap repair. *J. Bacteriol.* **172**, 6169-6172 (1990).
9. Altschul, S.F., Gish, W., Miller, W., Myers, E.W. & Lipman, D.J. Basic local alignment search tool. *J. Mol. Biol.* **215**, 403-410 (1990).
10. Eltis, L.D., Karlson, U. & Timmis, K.N. Purification and characterization of cytochrome P450RR1 from *Rhodococcus rhodochrous*. *Eur. J. Biochem.* **213**, 211-216 (1993).
11. Juni, E. & Janik, A. Transformation of *Acinetobacter calcoaceticus* (*Bacterium anitratum*). *J. Bacteriol.* **98**, 281-288 (1969).
12. Vanechoutte, M. *et al.* Naturally transformable *Acinetobacter* sp. strain ADP1 belongs to the newly described species *Acinetobacter baylyi*. *App. Environ. Microbiol.* **72**, 932-936 (2006).
13. Yanisch-Perron, C., Vieira, J. & Messing, J. Improved M13 phage cloning vectors and host strains: nucleotide sequences of the M13mpl8 and pUC19 vectors. *Gene* **33**, 103-119 (1985).
14. Eraso, J.M. & Kaplan, S. *prrA*, a putative response regulator involved in oxygen regulation of photosynthesis gene expression in *Rhodobacter sphaeroides*. *J. Bacteriol.* **176**, 32-43 (1994).
15. Jones, R.M. & Williams, P.A. Mutational analysis of the critical bases involved in activation of the *AreR*-regulated  $\sigma^{54}$ -dependent promoter in *Acinetobacter* sp. strain ADP1. *App. Environ. Microbiol.* **69**, 5627-5635 (2003).
16. Lynch, M.D. & Gill, R.T. Broad host range vectors for stable genomic library construction. *Biotechnol. Bioeng.* **94**, 151-158 (2006).
17. Johnson, C.W. & Beckham, G.T. Aromatic catabolic pathway selection for optimal production of pyruvate and lactate from lignin. *Metab. Eng.* **28**, 240-247 (2015).
18. Vardon, D.R. *et al.* Adipic acid production from lignin. *Energy Environ. Sci.* **8**, 617-628 (2015).
19. Salis, H.M., Mirsky, E.A. & Voigt, C.A. Automated design of synthetic ribosome binding sites to control protein expression. *Nature biotechnol.* **27**, 946 (2009).
20. Horton R.M., Cai Z.L., Ho S.N., & Pease L.R. Gene splicing by overlap extension: tailor-made genes using the polymerase chain reaction. *Biotechniques* **8**, 528-535 (1990).
